# Supplementary material for: Biocontrol Potential of Bacillus amyloliquefaciens against Botrytis pelargonii and Alternaria alternata on Capsicum annuum
Source: MDPI journal article supplement (doi:10.3390/jof7060472), 2021-06-10
Supplement: s1 [file s1]

## Supplementary materials

### **Biocontrol potential of *Bacillus amyloliquefaciens* against *Botrytis pelargonii* and *Alternaria alternata* associated with *Capsicum annuum***

Elham Ahmed Kazerooni<sup>1\*</sup>, Sajeewa S. N. Maharachchikumbura<sup>2</sup>, Abdullah Mohammed Al-Sadi<sup>3</sup>, Sang-Mo Kang<sup>1</sup>, Byung-Wook Yun<sup>1</sup>, In-Jung Lee<sup>1\*</sup>

<sup>1</sup>Department of Applied Biosciences, Kyungpook National University, Daegu 41566, Republic of Korea

<sup>2</sup>School of Life Science and Technology, University of Electronic Science and Technology of China, Chengdu 15 611731, People's Republic of China

<sup>3</sup>Department of Plant Sciences, College of Agricultural and Marine Sciences, Sultan Qaboos University, PO Box 34, Al-Khod 123, Oman

#### **\*Corresponding authors**

Prof. In-Jung lee  
Dr. Elham Ahmed Kazerooni  
Crop Physiology Laboratory  
Department of Applied Biosciences  
Kyungpook National University  
Daegu 41566, Republic of Korea  
E-mail: [ijlee@knu.ac.kr](mailto:ijlee@knu.ac.kr)  
E-mail: [elham.ghasemi.k@gmail.com](mailto:elham.ghasemi.k@gmail.com)  
Tel: +82-53-950-5708(Office)

**Table S1.** Primers used in this study for PCR amplification of the 18S rDNA fungal isolates

| Gene symbol | Primers (5'–3') Forward/reverse |
|-------------|---------------------------------|
| ITS1        | 5'-TCC GTA GGT GAA CCT GCG G-3' |
| ITS4        | 5'-TCCTCCGCTTATTGATATGC-3'      |
| RPB2-5F2    | 5'-GGGGWGAYCAGAAGAAGGC-3'       |
| fRPB2-7cR   | 5'-CCCATRGCTTGYTTTCCCAT-3'      |
| Alt-for     | 5'ATGCAGTTCACCACCATCGC'3        |
| Alt-rev     | 5'ACGAGGGTGAYGTAGGCGTC'3        |
| gpd 1       | 5'CAACGGCTTCGGTCGCATTG'3        |
| gpd 2       | 5'GCCAAGCAGTTGGTTGTGC'3         |

**Table S2.** Physiochemical properties of the soil samples over eight days of treatment.

| Sample name | Soil texture | pH       | EC<br>(mS) | Moisture<br>(%) |
|-------------|--------------|----------|------------|-----------------|
| 8DAT        |              |          |            |                 |
| Cont        | sandy loam   | 7.0±0.0c | 1.18±0.0d  | 70±0.0d         |
| PGPR        | sandy loam   | 7.9±1.0a | 2.96±5.4a  | 86.6±11.5b      |
| BOT         | sandy loam   | 7.0±0.0c | 0.4±0.0e   | 46.6±4.4e       |
| BOT+PGPR    | sandy loam   | 7.8±0.0b | 2.1±0.0c   | 83.3±8.8c       |
| ALT         | sandy loam   | 6.9±6.2d | 0.37±3.9f  | 45.0±5.7f       |
| ALT+PGPR    | sandy loam   | 7.9±6.2a | 2.64±0.0b  | 90.0±10.0a      |

Values show the means ± standard error (n = 3) and significant differences at  $p < 0.05$  in accordance with the least significant difference test.

**Table S3.** Primers used for relative gene expression analysis.

| Gene symbol | Primers (5'–3') Forward/reverse                                                 |
|-------------|---------------------------------------------------------------------------------|
| CaWRKY2     | 5'-GTTTACCAATCGCCGAGACAG-3'<br>5'-CAGGTTCGTCACACTGCTCC-3'                       |
| CaBI-1      | 5'-ATATGGATCCATGGAGGGTTTCACGGTCGT-3'<br>5'-ATATGGATCCCTAGTTTCTCCTCTTCTTCTTC-3'  |
| CaBiP1      | 5'-AGAGATCCCTCAGTAGCCAGC-3'<br>5'-GTTGTTCAACTCCTCAAAACGT-3'                     |
| CaBiP2      | 5'-AAGAAGTTGAGGCAGTGTGC-3'<br>5'-TGTGAATCGTCATCATCGTTG-3'                       |
| CaBiP3      | 5'-CAACATACTCTTGTGTGGGCG-3'<br>5'-TGAAGGGGTGATTCTGTTTCC-3'                      |
| CaXTH1      | 5'-ATCCCATTTTCATCTTCAAATTAAAGC-3'<br>5'-GGGGAAATGATTTATTGTTATTTTCG-3'           |
| CaXTH2      | 5'-CTATGCCCGGCAGCTTGGGCTGAA-3'<br>5'-GACAACATTAGTAAACTCAATCC-3'                 |
| CaAMP1      | 5'-GAATTCATGGTTTCCAAAAGTAGTATTTTT-3'<br>5'-CTCGAGTTAGGCACAACAATAGTCACAACG-3'    |
| CaPR1       | 5'-CAGGATGCAACACTCTGGTGG-3'<br>5'-ATCAAAGGCCGGTTGGTC-3'                         |
| CaDEF1      | 5'-CAAGGGAGTATGTGCTAGTGAGAC-3'<br>5'-TGCACAGCACTATCATTGCATAC-3'                 |
| CaASRF1     | 5'-ATGGGCCTCTCACAATATCCAAC-3'<br>5'-TCACATTGGACACGTATCGTCCTCT-3'                |
| CaSBP11     | 5'-CGGGATCCATGGAGTCTTGGAGTTATTTCTCAGG-3'<br>5'-TCCCCCGGGGCAGTGATTCTAAGGCCGGG-3' |
| Actin       | 5'-ACTCTTAATCAATCCCTCCACC-3'<br>5'-CTGTATGACTGACACCATCACC-3'                    |

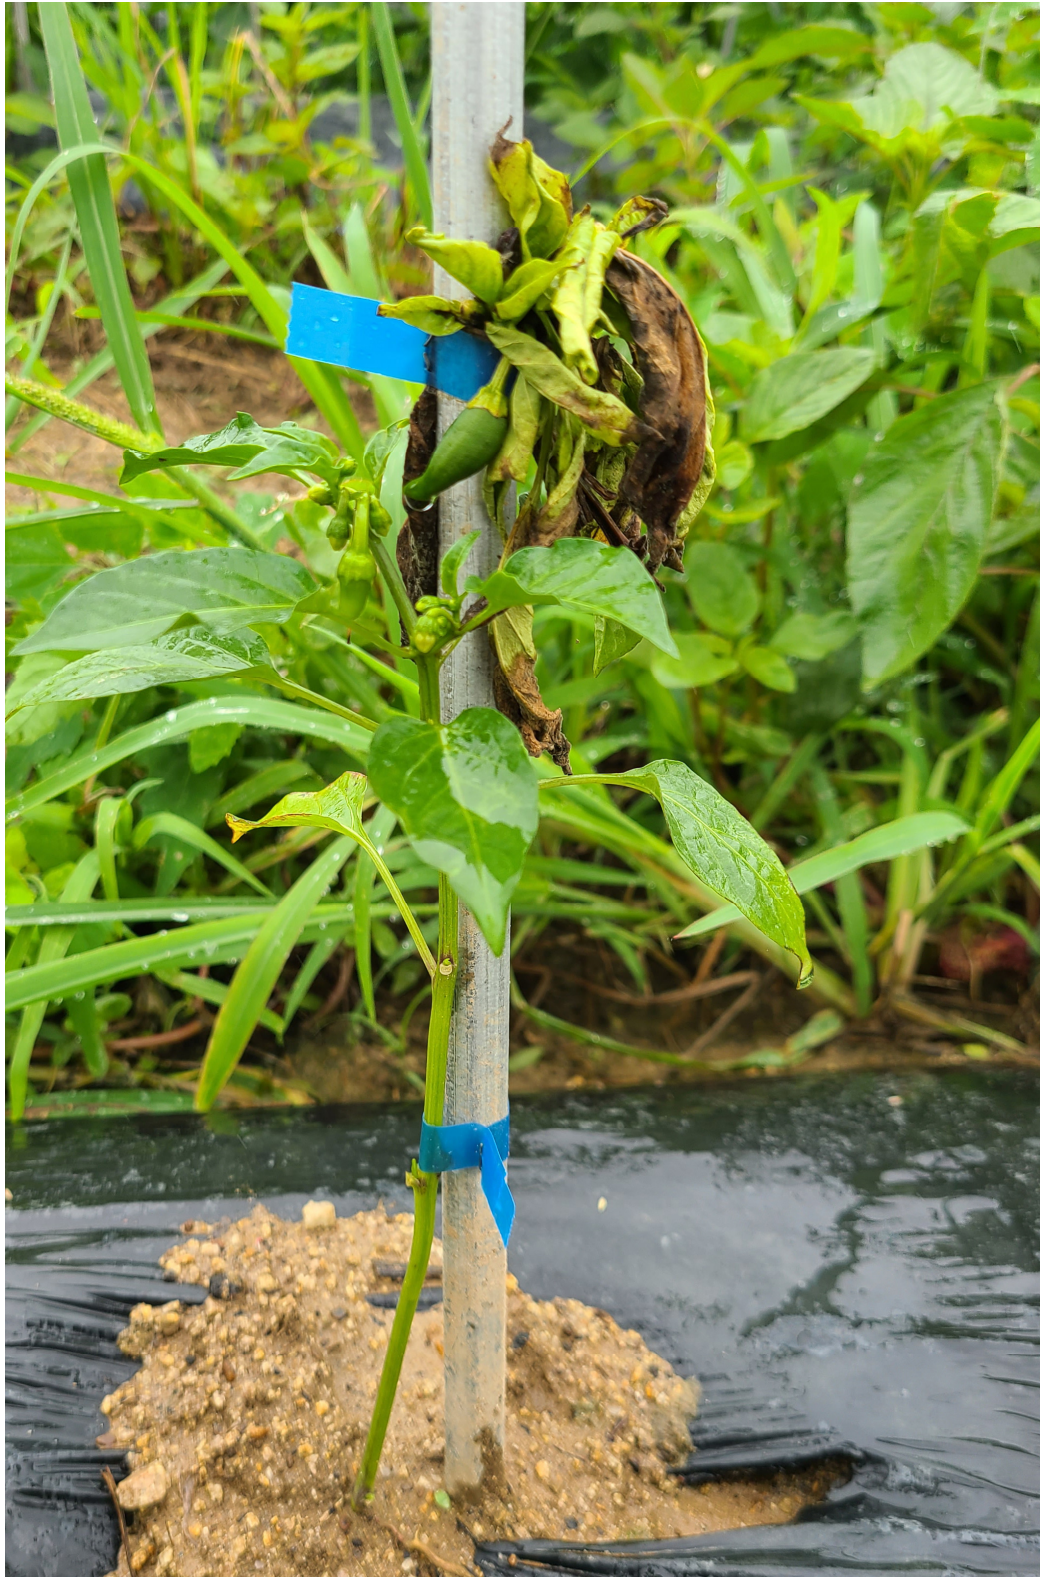

**Figure S1.** Symptomatic pepper plant collected from the farm



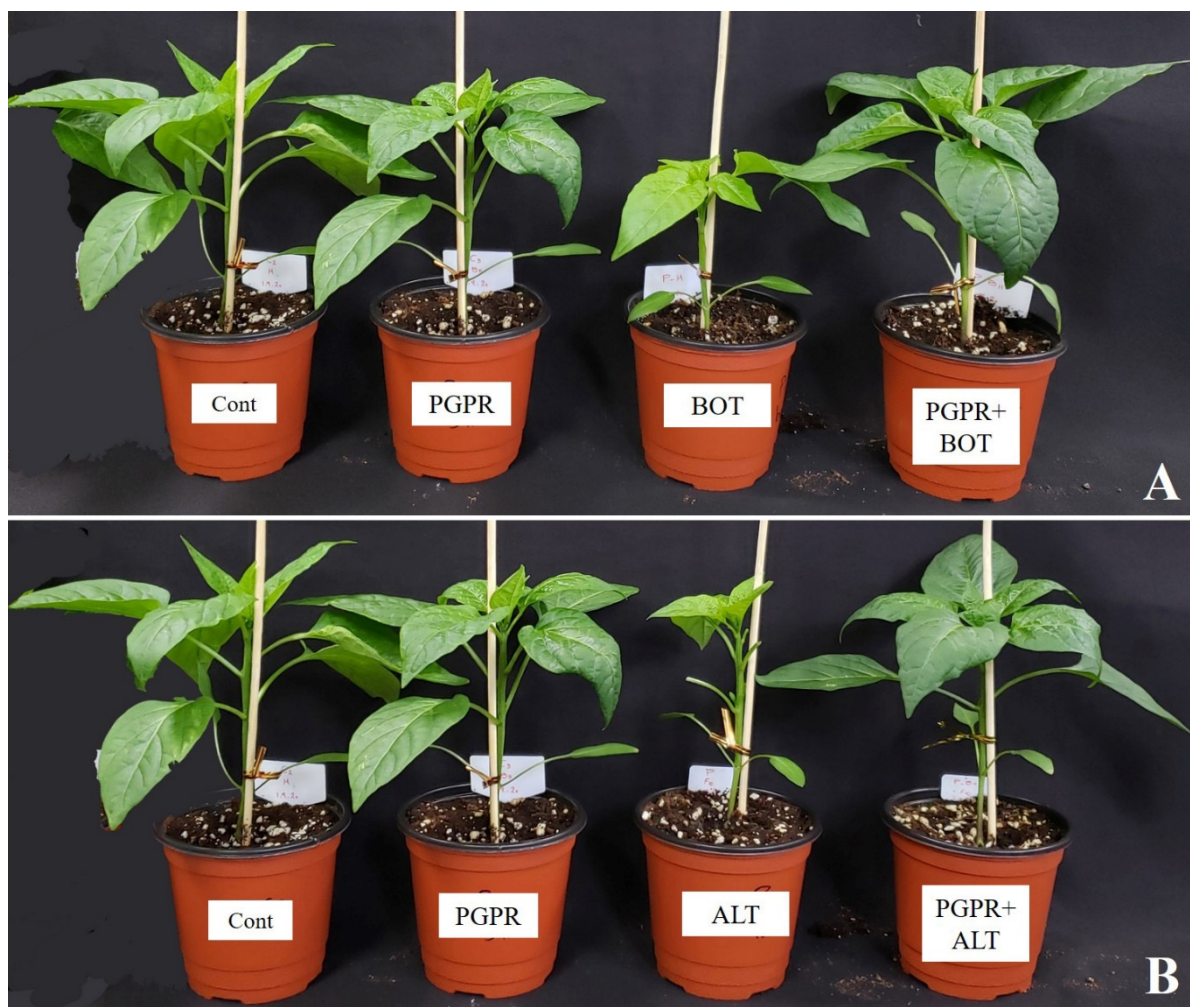

**Figure S2.** Effect of plant growth-promoting rhizobacteria (PGPR) inoculation on the pepper plants grown under normal and biotic stress conditions after eight days (A and B). Treatment: control, PGPR, BOT, PGPR + BOT, ALT, and PGPR + ALT.
